# Supplementary material for: Multiplexed pancreatic genome engineering and cancer induction by transfection-based CRISPR/Cas9 delivery in mice
Source: PubMed Central journal article supplement (PMC4773438; doi:10.1038/ncomms10770), 2016-02-26
Supplement: ncomms10770-s1.pdf [file ncomms10770-s1.pdf]

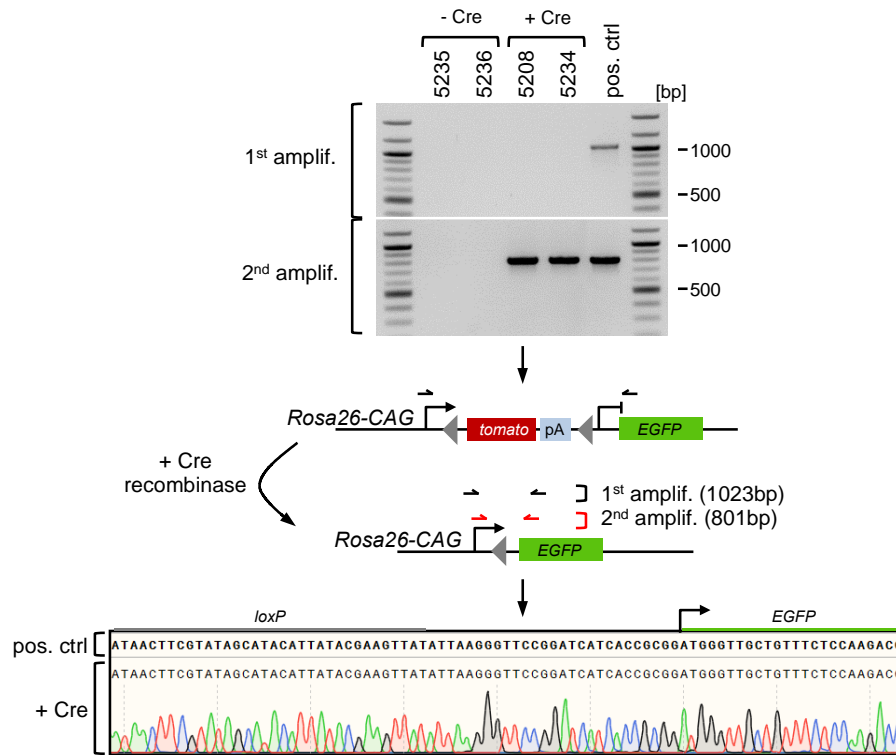

**Supplementary Figure 1 | Analysis of *Rosa26<sup>mT/mG</sup>* recombination in the mouse pancreas upon electroporation-based somatic Cre delivery.** Pancreata of four *Rosa26<sup>mT/mG</sup>* mice were electroporated with or without PGK-Cre plasmid and removed 7 days post electroporation (PE). Nested PCR was used to detect recombination at the *Rosa26<sup>mT/mG</sup>* allele. Primer locations are indicated by arrows. Fully recombined pancreata from *Ptf1a<sup>Cre/+</sup>; Rosa26<sup>mT/mG</sup>* mice were used as positive controls. Only this positive control gave a recombination band in the 1<sup>st</sup> PCR step, whereas in the second/nested PCR reaction Cre-electroporated pancreata also produced a band. For the second/nested PCR reaction input DNA (PCR product) of the positive control was diluted 1:10<sup>5</sup> as compared to the other samples (see materials and methods). PCR bands were sequenced to confirm deletion of the stop cassette. All together these results confirm the extremely low number of pancreatic cells to which plasmid DNA is delivered upon electroporation.

a

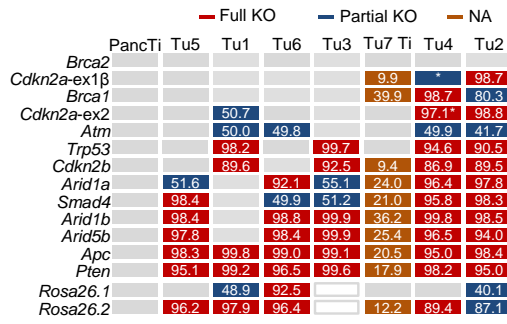

b

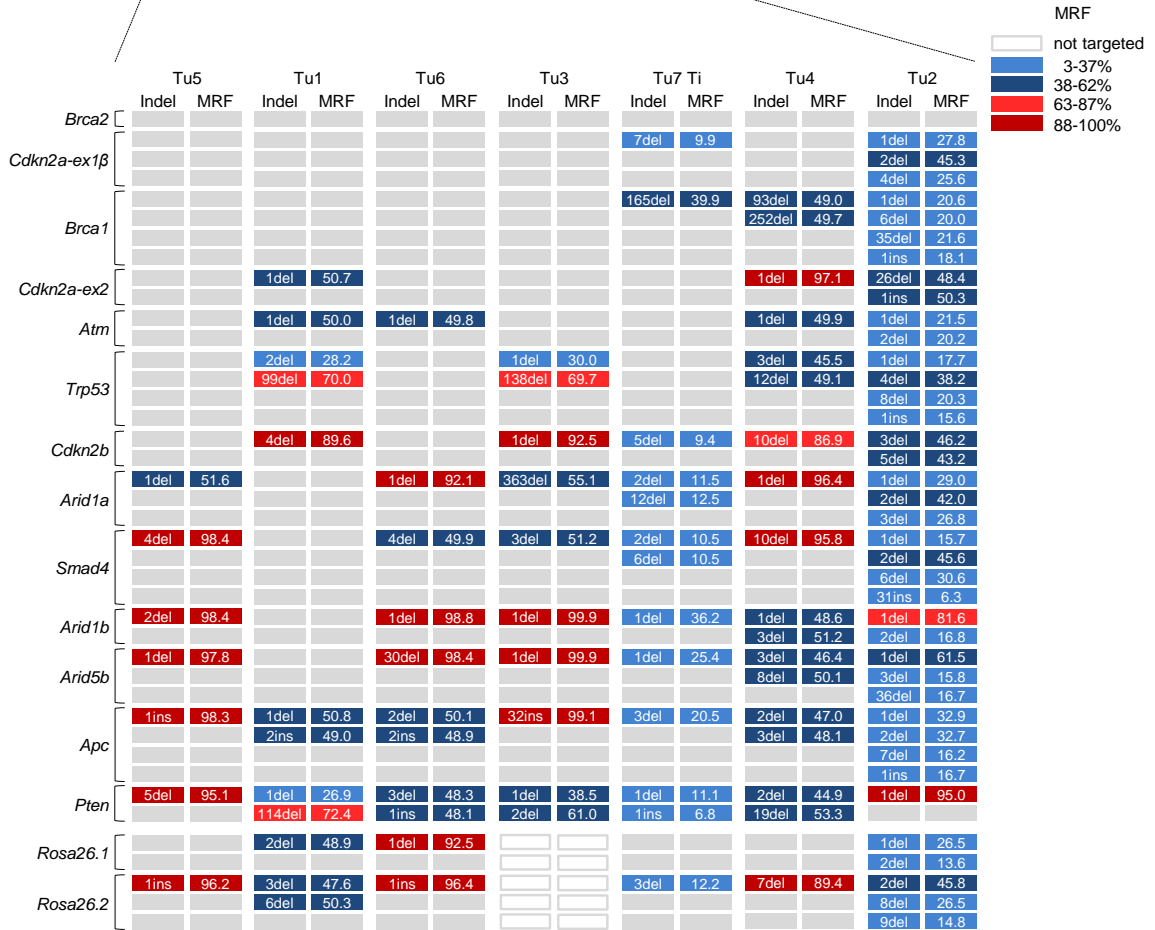

**Supplementary Figure 2 | Indels induced by multiplexed CRISPR/Cas9 in primary pancreatic tumours.** (a) Indels and allelic status at each target site in electroporated healthy pancreatic tissue (PancTi), PDAC cancer cell cultures (Tu1-6) and primary tumour tissue (Tu7; for which cell culture was not successful), as also shown in Figure 4A. Numbers in boxes indicate for each target site mutant read frequencies (MRFs; defined as the fraction of mutant sequence reads/all reads at individual target loci). Multiple mutations per target site are presented as one combined MRF. The asterisk stands for a large deletion at the *Cdkn2a* locus

with fusion of *Cdkn2a-ex1 $\beta$*  and *Cdkn2a-ex2* (see also Figure 6). **(b)** Detailed presentation of individual mutations and their MRFs at target sites for each tumour.

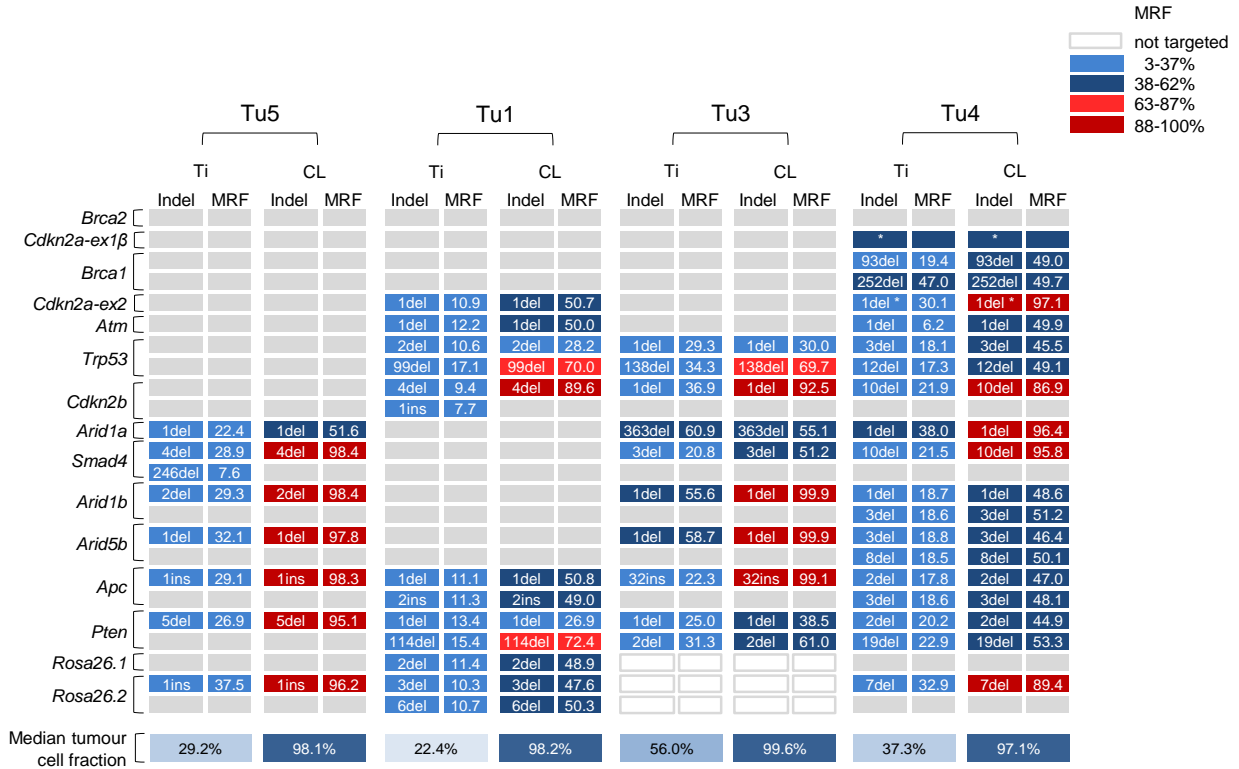

**Supplementary Figure 3 | Comparison of CRISPR/Cas9 induced indels in pancreatic tumour tissue and corresponding cell lines.** Indels and corresponding MRFs are presented for each target site. The comparison allowed estimation of the median tumour cell fraction in primary pancreatic cancer tissue (only homozygous mutations were used for these calculations). The median tumour cell content for tissue samples ranged between 22 and 56 percent. In contrast, cell cultures presented pure cancer cell populations allowing discrimination of hetero- or homozygous gene inactivation.

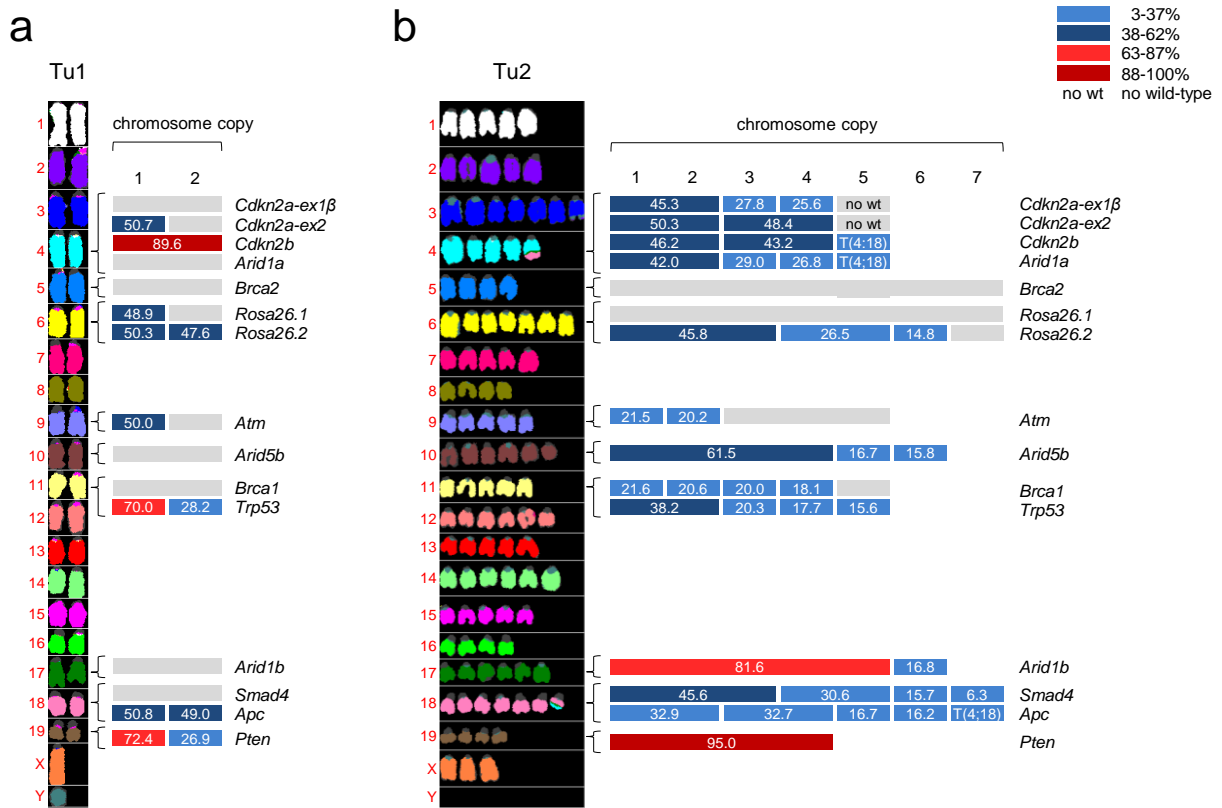

**Supplementary Figure 4 | Examples of mutational spectra in a diploid (Tu1) and a polyploid/aneuploid cancer (Tu2).** M-FISH and next generation sequencing of target sites were performed on primary cancer cell cultures. For each target site distinct mutations and their corresponding MRFs are visualized in individual boxes, which are assigned to individual chromosomes. **(a)** In the scenario of a diploid genome the inactivation type (homo- or heterozygous) can be easily inferred from MRFs. In *Cdkn2a-ex2*, *Rosa26.1* and *Atm*, there was only one type of mutation at target sites and MRFs were ~50%, reflecting heterozygosity. Conversely, homozygous target gene inactivation of *Cdkn2b*, *Rosa26.2*, *Trp53*, *Apc* and *Pten* is a result of one or two distinct mutations at each locus with a total MRF of 100% (lack of wild-type reads). **(b)** In tumours with a complex polyploid/aneuploid genome, interpretation of MRFs is more difficult but can be fully explained and reconciled with underlying karyotypes. For example, four distinct *Brca1* mutations (each MRFs of ~20%) were identified in Tu2, which also had ~20% wild-type *Brca1* sequence. M-FISH revealed pentaploidy of Chr11, explaining the MRF pattern. The existence of more than 2 mutations at target sites in Tu2 reflects early polyploidization during transient CRISPR/Cas9 expression.

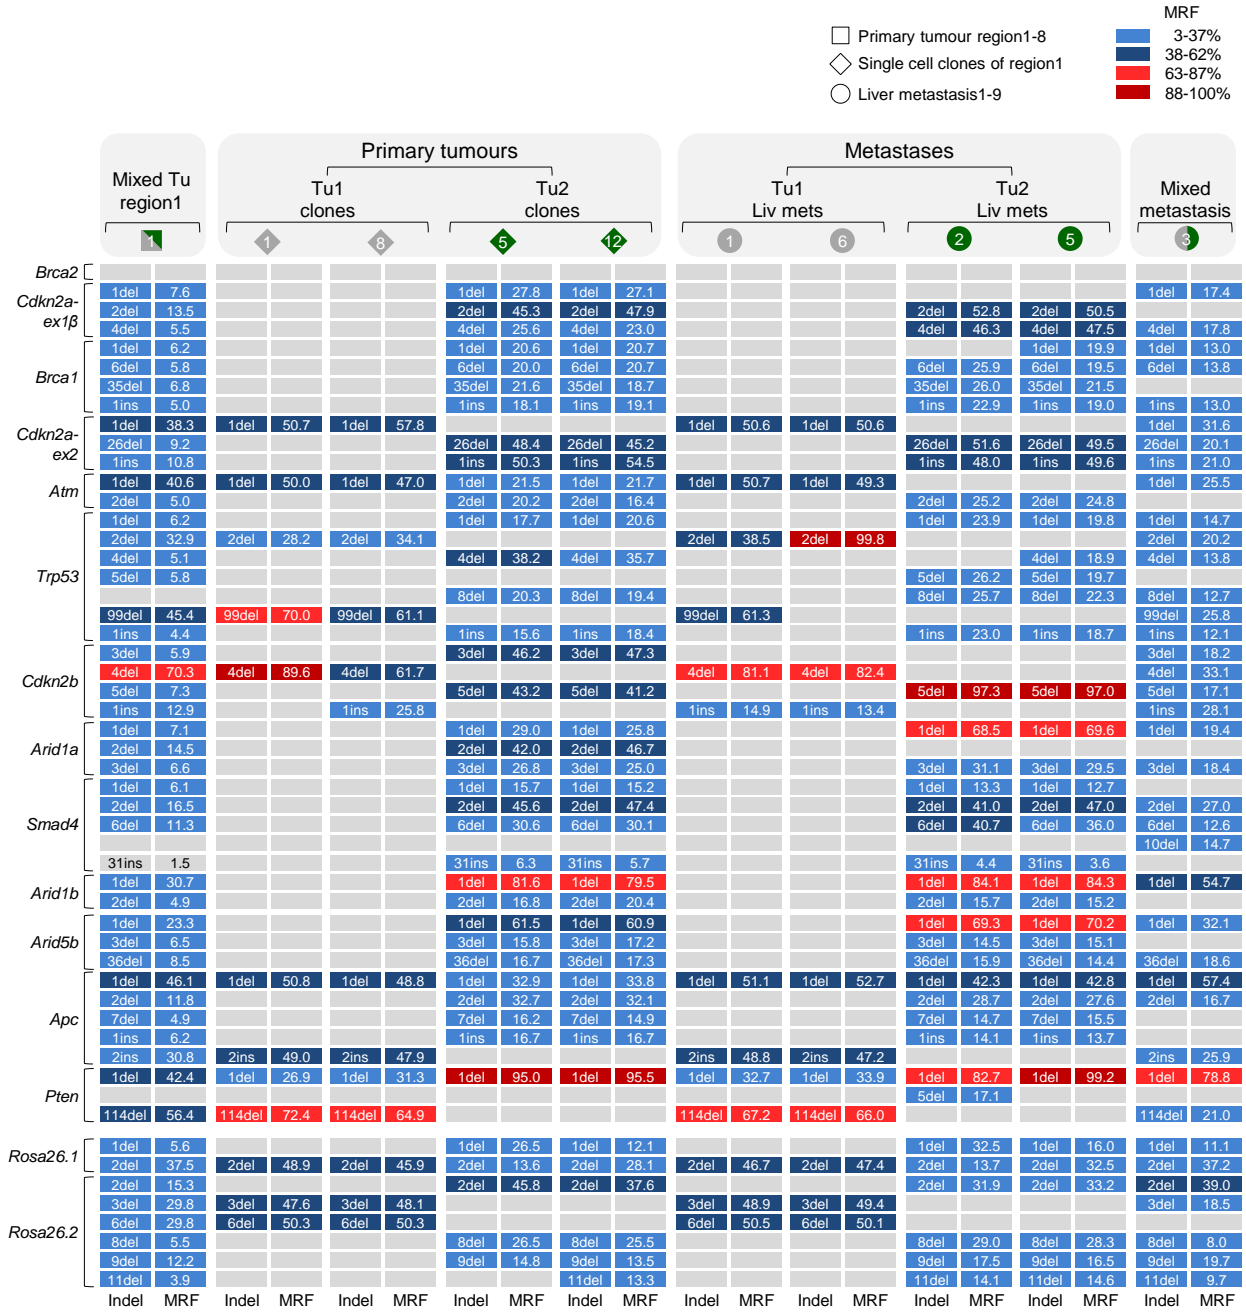

**Supplementary Figure 5 | Phylogenetic tracking of CRISPR/Cas9-induced metastatic PDAC.** This Supplementary Figure is related to Figure 5, which shows cumulative MRFs at target sites in two independent primary and metastatic PDAC cell lines derived from one mouse. Here, indels and corresponding MRFs are presented in detail for each target site. Note that although different single cell clones derived from individual tumours had largely identical indel patterns, some minor differences could be occasionally observed. For example, most of the Tu1 clones had a 4del and a 1ins mutation at *Cdkn2b* (shown for Tu1-clone8). However, Tu1-clone1 lost the 1ins indel, thereby gaining “homozygosity” for 4del.

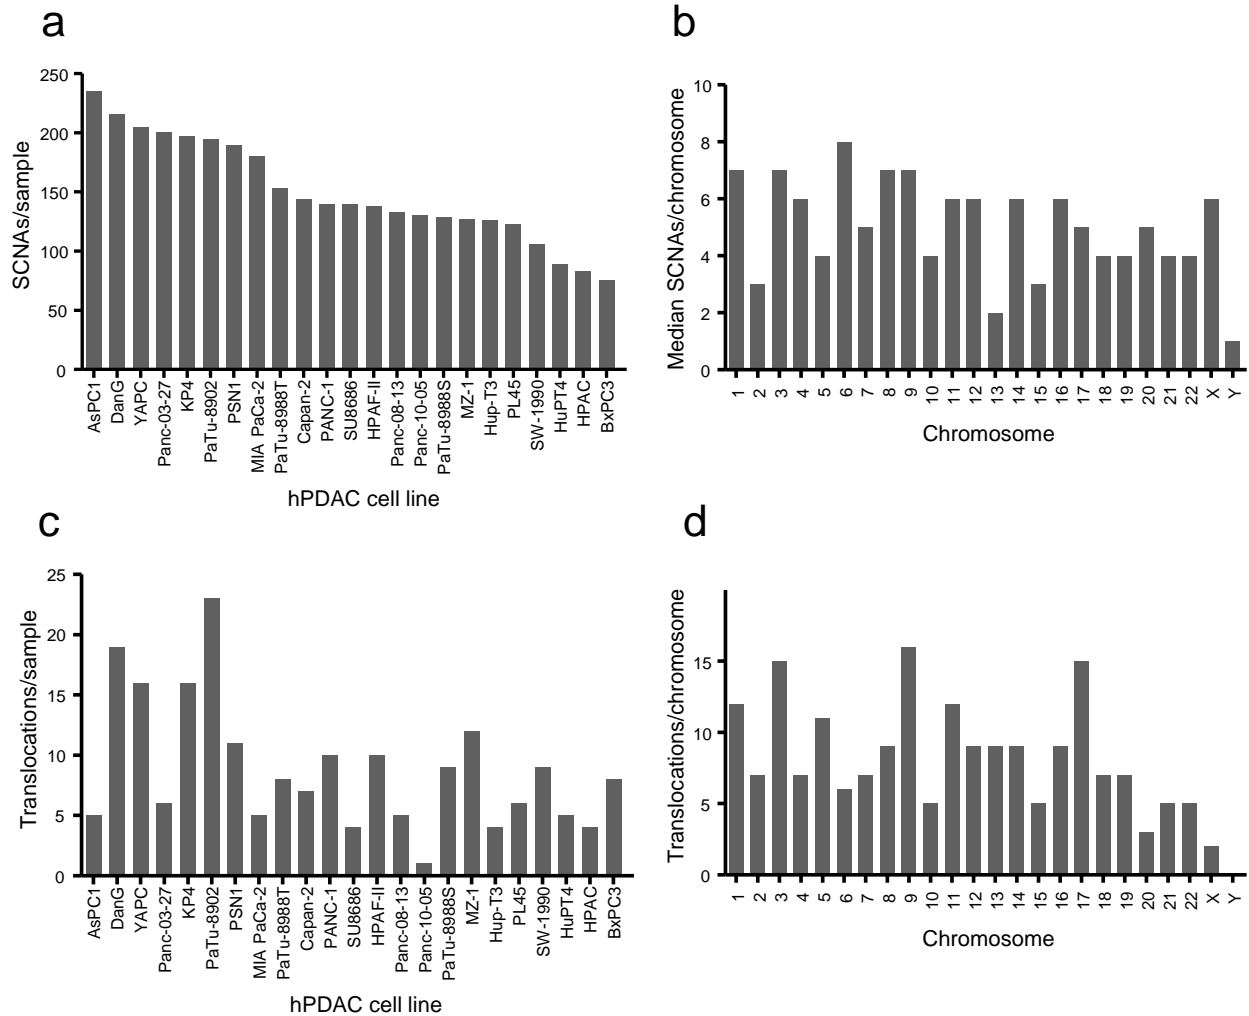

**Supplementary Figure 6 | Somatic copy number alterations (SCNAs) and translocations in human PDAC cell lines.** A set of 23 human PDAC cell lines has been analysed for SCNAs (deletions or amplifications) and translocations by high-density array CGH and M-FISH, respectively. **(a)** Total number of all SCNAs detected in each cell line. Cell lines are sorted by SCNA frequency. **(b)** Median number of SCNAs observed in all cell lines shown for individual chromosomes. **(c)** Total number of all translocations identified in each cell line. Cell lines are listed as given in (a). **(d)** Total number of translocations observed in all cell lines shown for individual chromosomes.

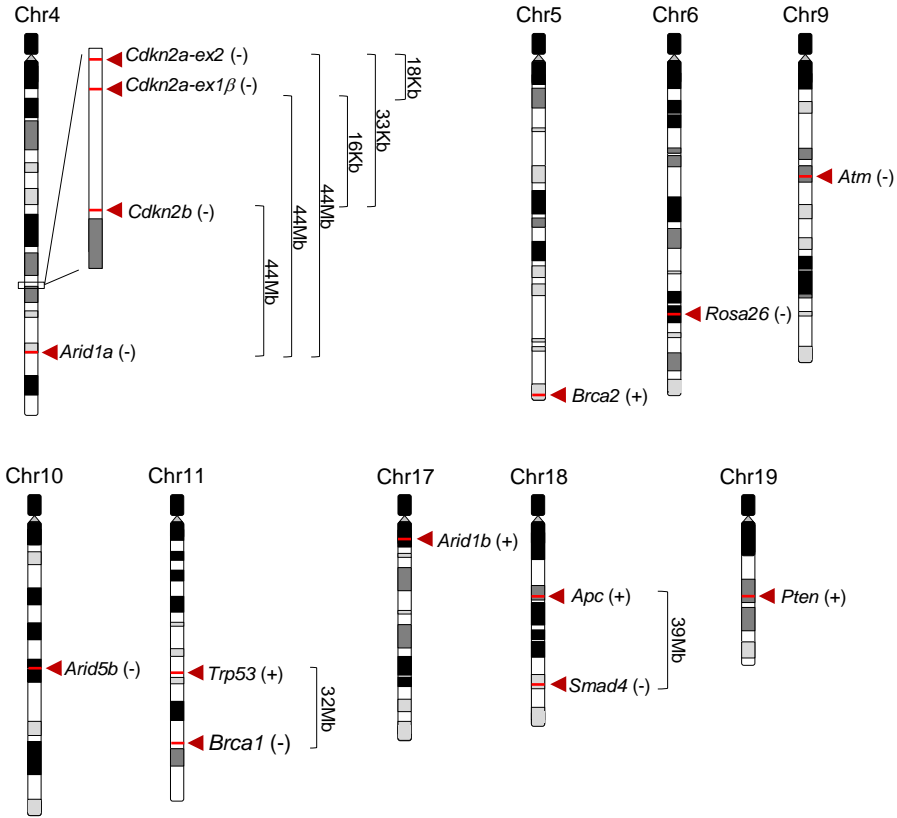

**Supplementary Figure 7 | Chromosomal localisation of sgRNA target sites.** Scheme of all targeted sites and potential intra-chromosomal deletions resulting from combinatorial target site cleavage in the 15 sgRNA multiplexing experiments performed in this study. Red arrow heads indicate sgRNA target sites and brackets mark the size of potential intra-chromosomal deletions. All pancreatic cancers were screened for fusion events resulting from indicated deletions.



| Gene   | Type            | Range         | Reference(s)                       |
|--------|-----------------|---------------|------------------------------------|
| APC    | MUT             | 9%            | (2/23)# <sup>1</sup>               |
|        | DEL, METH, LOSS | 48%, 56%, 58% | (12/25, 24/43, 14/24) <sup>2</sup> |
| ARID1A | MUT             | 9%            | (2/23)# <sup>1</sup>               |
|        | MUT             | 4%            | (4/99) <sup>3</sup>                |
|        | MUT             | 8%            | (2/24) <sup>4</sup>                |
| ARID1B | DEL             | 4%            | (3/77) <sup>5</sup>                |
| ARID5B | ---             | ---           | ---                                |
| ATM    | MUT             | 4%            | (1/23)# <sup>1</sup>               |
|        | MUT             | 5%            | (5/99) <sup>3</sup>                |
| BRCA1  | MUT             | 13%           | (15/102)* <sup>6</sup>             |
| BRCA2  | MUT             | 10%           | (4/41)* <sup>7</sup>               |
|        | MUT             | 10%           | (4/39)* <sup>8</sup>               |
|        | MUT             | 4%            | (1/23)# <sup>1</sup>               |
| CDKN2A | DEL, MUT        | 41%, 38%      | (15/37, 14/37) <sup>9</sup>        |
|        | DEL, MUT, PM    | 48%, 34%, 14% | (24/50, 17/50, 7/50) <sup>10</sup> |
| CDKN2B | ---             | ---           | ---                                |
| P53    | MUT             | 70%           | (19/27) <sup>11</sup>              |
|        | MUT             | 33%           | (33/99) <sup>3</sup>               |
|        | MUT             | 75%           | (18/24) <sup>4</sup>               |
|        | MUT             | 13%           | (3/23)# <sup>1</sup>               |
| PTEN   | LOSS            | 63%           | (5/8) <sup>12</sup>                |
| SMAD4  | LOSS, MUT, DEL  | 37%           | (31/84) <sup>13</sup>              |

# Acinar Cell Carcinoma  
\* Germline mutation  
LOSS Loss of expression  
DEL Deleted  
MUT Mutated  
PM Promoter methylation  
METH Gene methylation

**Supplementary Table 1 | Tumour suppressor genes previously reported to be involved in pancreatic tumourigenesis.** All tumour suppressor genes targeted by CRISPR/Cas9 as well as their inactivation type and frequency of inactivation (range) in human pancreatic cancer are given for each reference. Numbers in brackets correspond to mutated cases per total cases included within each individual study.

| Mouse ID                                                       | Gender | Tumor ID | First tumour diagnosis (weeks) | Sacrificed (weeks) | Tumour histology    |
|----------------------------------------------------------------|--------|----------|--------------------------------|--------------------|---------------------|
| 2 "neutral" sgRNA mice                                         |        |          |                                |                    |                     |
| PPK 203                                                        | male   | -        | No                             | No                 | -                   |
| PPK 211                                                        | male   | -        | No                             | No                 | -                   |
| PPK 250                                                        | male   | -        | No                             | No                 | -                   |
| Pank0032                                                       | female | -        | No                             | No                 | -                   |
| Pank0012                                                       | female | -        | No                             | No                 | -                   |
| Pank0101                                                       | female | -        | No                             | No                 | -                   |
| Pank0103                                                       | female | -        | No                             | No                 | -                   |
| ÖR0912                                                         | female | -        | No                             | No                 | -                   |
| 15 sgRNA mix mice (13 tumour suppressor genes and 2 „neutral“) |        |          |                                |                    |                     |
| Pank 21                                                        | male   | Tu4      | 4.9                            | 5                  | G2-3 PDAC           |
| Pank 31                                                        | male   | Tu5      | 10                             | 10                 | G4 PDAC/Sarcomatoid |
| PPK 4f                                                         | female | -        | No                             | No                 | -                   |
| PPK 15f                                                        | female | -        | No                             | No                 | -                   |
| PPK 40f                                                        | female | Tu6, Tu7 | 11.7                           | 12                 | G4 PDAC/Sarcomatoid |
| PPK 103f                                                       | female | N/a      | 4.3                            | 12                 | G2-3 PDAC           |
| PPK 4m                                                         | male   | -        | No                             | No                 | -                   |
| PPK 5m                                                         | male   | -        | No                             | No                 | -                   |
| PPK 6m                                                         | male   | N/a      | 18.7                           | 20.6               | G2 PDAC             |
| MZ1504                                                         | female | -        | No                             | No                 | -                   |
| E2109                                                          | male   | Tu3      | 21.3                           | 22                 | G4 PDAC/Sarcomatoid |
| MZ1501                                                         | male   | Tu1, Tu2 | N/a                            | 10.7               | G2-3 PDAC           |
| MZ1438                                                         | male   | -        | N/a                            | 10                 | -                   |

**Supplementary Table 2 | Acceleration of pancreatic tumour formation in *Ptf1a*<sup>Cre/+</sup>;*Kras*<sup>LSL-G12D/+</sup> mice after somatic delivery of multiple sgRNAs by electroporation.** Pancreatic cancers were either diagnosed by MRI-based imaging or by macroscopic inspection of isolated tumours. Control mice were electroporated with two guides targeting “neutral” *Rosa26* locus. Additionally to *Rosa26*-targeting control guides, experimental cohort was also injected with 13 sgRNAs binding relevant tumour suppressor genes in PC. (N/a, not analysed).

| Name          | Chr   | Str. | Position (mm10) | Genomic sequence at off-target site | Number of mismatches | Score | Gene         |
|---------------|-------|------|-----------------|-------------------------------------|----------------------|-------|--------------|
| <i>Apc</i>    |       |      |                 |                                     |                      |       |              |
| OT_Apc_1      | Chr9  | -1   | 26933897        | TCAGTTATTAAGCAAATTGGGG              | 2                    | 2.27  | None         |
| OT_Apc_2      | Chr14 | 1    | 77604446        | GCAGTTGAGAAAGCAAGTTGGAG             | 3                    | 1.63  | None         |
| OT_Apc_3      | Chr3  | -1   | 114376816       | TCAGATTATAAGCAAGTTGTGG              | 3                    | 1.62  | None         |
| OT_Apc_4      | Chr5  | 1    | 75817666        | TTAGCTGTAAAGCAAGTTACAG              | 3                    | 1.49  | None         |
| OT_Apc_5      | Chr10 | 1    | 94379839        | TCAGATGGGAAAGCAAGTTGCAG             | 3                    | 1.48  | None         |
| OT_Apc_6      | Chr13 | 1    | 106857412       | TAAGTTGCTATAGCAACTTGAAG             | 4                    | 0.34  | NM_029665    |
| OT_Apc_7      | Chr7  | 1    | 12984855        | TCAGTTCCTACAGCAAGTTCCAG             | 4                    | 0.24  | NM_001168561 |
| OT_Apc_8      | Chr10 | -1   | 52195004        | AGAGTTCCTAAAGCAAGGTGGAG             | 4                    | 0.22  | NM_011282    |
| <i>Arid1a</i> |       |      |                 |                                     |                      |       |              |
| OT_Arid1a_1   | Chr17 | 1    | 27452698        | CCAGGCCACCATATGGCTGAGG              | 4                    | 0.42  | None         |
| OT_Arid1a_2   | Chr5  | -1   | 122707741       | TGAGCCCCACTTTACGGCTGCGG             | 4                    | 0.40  | NM_011026    |
| OT_Arid1a_3   | Chr8  | 1    | 89565625        | TGGGACCCACCATACCGCTGTGG             | 4                    | 0.26  | None         |
| OT_Arid1a_4   | Chr16 | -1   | 13032943        | TTAAACCCACCATACGCCTAAAG             | 4                    | 0.26  | None         |
| OT_Arid1a_5   | Chr8  | -1   | 126296723       | ATAGTCCATCCATAGGGCTGAAG             | 4                    | 0.25  | None         |
| OT_Arid1a_6   | Chr15 | 1    | 79917925        | TGTGTCCACCACAAGGCTGGAG              | 4                    | 0.16  | NM_144811    |
| OT_Arid1a_7   | Chr1  | 1    | 164211867       | ATAGACCCACCCCTCGGCTGGAG             | 4                    | 0.11  | NM_007976    |
| <i>Arid1b</i> |       |      |                 |                                     |                      |       |              |
| OT_Arid1b_1   | Chr18 | -1   | 34860543        | CCGCCACCTCGGGACCGTGGG               | 4                    | 0.79  | None         |
| OT_Arid1b_2   | Chr1  | 1    | 166651815       | CTAGGCAACTGGGGACCCCTGAG             | 4                    | 0.50  | None         |
| OT_Arid1b_3   | Chr12 | -1   | 21167366        | CTGAGCACACTGGGGACCGTGAG             | 4                    | 0.43  | None         |
| OT_Arid1b_4   | Chr16 | -1   | 85798156        | CTGGGGACCATGGGGACCGTGGG             | 4                    | 0.43  | NM_009621    |
| OT_Arid1b_5   | Chr9  | -1   | 45838687        | CTTTGCAGCTTGGGGACCGACAG             | 4                    | 0.37  | NM_011792    |
| OT_Arid1b_6   | Chr9  | 1    | 49250583        | CTCAGCTCCTGGGGACCCCTGGG             | 4                    | 0.34  | NM_177701    |
| <i>Arid5b</i> |       |      |                 |                                     |                      |       |              |
| OT_Arid5b_1   | Chr16 | -1   | 64165874        | TCTATGCAAGTCAGATCCTTTAG             | 3                    | 1.06  | None         |
| OT_Arid5b_2   | Chr13 | -1   | 8753315         | GCTATGCCACTCTGATCCTTCAG             | 3                    | 0.89  | None         |
| OT_Arid5b_3   | Chr10 | -1   | 87808962        | GCTGTTCAAATCGGATCCTGTAG             | 3                    | 0.85  | None         |
| OT_Arid5b_4   | Chr3  | 1    | 20285892        | AGTTTGCAAATGGGATCCTTGGG             | 4                    | 0.73  | None         |
| OT_Arid5b_5   | Chr1  | 1    | 107504467       | CCTATGCAAATCTGATCCTAAAG             | 3                    | 0.60  | None         |
| OT_Arid5b_6   | Chr7  | 1    | 123235828       | CCTGTGCAAATCCTATCCTTTGG             | 4                    | 0.09  | NM_146198    |
| OT_Arid5b_7   | Chr6  | 1    | 125679494       | CCTATGCAAATTGTATCCCTCAG             | 4                    | 0.04  | NM_011708    |
| <i>Atm</i>    |       |      |                 |                                     |                      |       |              |
| OT_Atm_1      | Chr13 | -1   | 46896751        | TGTTATCAACTACCGAAAACCTAG            | 4                    | 0.72  | None         |
| OT_Atm_2      | Chr10 | -1   | 80700847        | ACCTGAGAACTTCGAAAACCAG              | 4                    | 0.56  | None         |
| OT_Atm_3      | Chr13 | -1   | 37858202        | CTCTGAAAACCTCCGAAAACCTGG            | 4                    | 0.56  | None         |
| OT_Atm_4      | Chr3  | 1    | 120488144       | GATTGTCTACTTCCAAAACCTGG             | 4                    | 0.40  | None         |
| OT_Atm_5      | Chr7  | -1   | 49024377        | GACTGTCAACTTCTAAAAACAG              | 3                    | 0.40  | None         |
| OT_Atm_6      | Chr9  | -1   | 116131633       | GACTGTCCACTTGCGACAACCAG             | 4                    | 0.24  | NM_029575    |
| OT_Atm_7      | Chr18 | -1   | 67878014        | GGCACTCAACATCCAAAACCTGG             | 4                    | 0.22  | NM_027556    |
| OT_Atm_8      | Chr9  | -1   | 59327354        | GGCTATCAGCTGCCTAAAAACGAG            | 4                    | 0.12  | NM_175325    |
| <i>Brca1</i>  |       |      |                 |                                     |                      |       |              |
| OT_Brca1_1    | Chr18 | 1    | 24000244        | AAATCTTGGAGTGCCGGTCAAG              | 2                    | 1.69  | None         |
| OT_Brca1_2    | Chr10 | -1   | 125354400       | AAATTTTGTGTGTCCCATCAAG              | 3                    | 1.05  | None         |
| OT_Brca1_3    | Chr11 | 1    | 111491635       | AATCTTAGAATGTCCCATCCAG              | 3                    | 0.66  | None         |
| OT_Brca1_4    | Chr5  | -1   | 34202516        | ACATCTGTGAGTGCCCATCCAG              | 4                    | 0.42  | None         |
| OT_Brca1_5    | Chr3  | -1   | 7612625         | AAGTCTGGGAGTTTCCGATCCAG             | 4                    | 0.38  | None         |

|                    |       |    |           |                          |   |      |              |
|--------------------|-------|----|-----------|--------------------------|---|------|--------------|
| OT_Brca1_6         | Chr17 | 1  | 35127508  | GAACCTTGGAGTGCCGCTCAAG   | 4 | 0.32 | NM_033477    |
| OT_Brca1_7         | Chr12 | 1  | 110855953 | ACATCTTACAGTGTCAGATGGGG  | 4 | 0.07 | NM_001199785 |
| OT_Brca1_8         | Chr1  | 1  | 60486355  | AAATCTTAAATTGTCTTATCTGG  | 4 | 0.03 | NM_001045513 |
| <i>Brca2</i>       |       |    |           |                          |   |      |              |
| OT_Brca2_1         | Chr16 | 1  | 7627804   | TATGACCAATGAGCCTCAATAAG  | 3 | 1.46 | None         |
| OT_Brca2_2         | Chr5  | -1 | 37348530  | GATGACCATAAGCCTCAAAGAG   | 4 | 0.70 | NM_145920    |
| OT_Brca2_3         | Chr7  | -1 | 83675639  | TGGAACAGCTAAGCCTCAATCAG  | 4 | 0.58 | None         |
| OT_Brca2_4         | Chr6  | 1  | 101239153 | TTAGACCTATAAACCTCAATGAG  | 4 | 0.56 | None         |
| OT_Brca2_5         | ChrX  | -1 | 10836554  | GAGAAGTATTAGCCTCAATAGG   | 4 | 0.55 | None         |
| OT_Brca2_6         | Chr12 | -1 | 36476693  | AAGGACAGATAAACCTCATTAGG  | 4 | 0.14 | NM_178629    |
| OT_Brca2_7         | Chr5  | -1 | 123819253 | TAGGAACGCTACGGCTCAATAGG  | 4 | 0.04 | NM_001042421 |
| <i>Cdkn2a-ex1β</i> |       |    |           |                          |   |      |              |
| OT_Cdkn2a-ex1β_1   | Chr8  | 1  | 44728100  | TGATTAAGTTCGTGAGATCCTGG  | 3 | 0.79 | None         |
| OT_Cdkn2a-ex1β_2   | Chr2  | -1 | 30208726  | CAGTGAAGTGCCTGCGATCCCAG  | 4 | 0.67 | None         |
| OT_Cdkn2a-ex1β_4   | Chr6  | -1 | 87833508  | AGGTGTGGTGCCTGCGATCCCAG  | 4 | 0.54 | None         |
| OT_Cdkn2a-ex1β_5   | Chr16 | 1  | 39487042  | AAGTGAAGTTTGTGCGTTCCCAG  | 4 | 0.34 | None         |
| OT_Cdkn2a-ex1β_6   | Chr13 | -1 | 50417915  | TGCTGCAGTTCGTGCGGGCCAAG  | 4 | 0.07 | NM_175401    |
| OT_Cdkn2a-ex1β_7   | Chr11 | -1 | 120809527 | TGTGGAAGTTCGTGAGATCCTGG  | 4 | 0.06 | NM_007988    |
| OT_Cdkn2a-ex1β_8   | ChrX  | 1  | 58919170  | TGGTGAAGTTTCTGAGCTCCAAG  | 4 | 0.04 | NM_023774    |
| <i>Cdkn2a-ex2</i>  |       |    |           |                          |   |      |              |
| OT_Cdkn2a-ex2_1    | Chr4  | 1  | 148874074 | GTGGGAGATCTGCGTTCCGTAAG  | 4 | 0.42 | None         |
| OT_Cdkn2a-ex2_2    | Chr7  | 1  | 126924957 | GTGCGTTCTTTGCGTTGCGTGGG  | 4 | 0.15 | None         |
| OT_Cdkn2a-ex2_3    | Chr4  | 1  | 45255256  | GTGCCATATCCAGTTCGCAAG    | 4 | 0.15 | None         |
| OT_Cdkn2a-ex2_4    | Chr2  | 1  | 180925924 | GTGGGACATTTGGGTTCCCTCTGG | 4 | 0.13 | None         |
| OT_Cdkn2a-ex2_5    | Chr8  | -1 | 72157092  | GTTCAATATTTGTGTTCTGCCAG  | 4 | 0.12 | None         |
| OT_Cdkn2a-ex2_6    | Chr11 | -1 | 95675148  | GTGTGATATTGACGTTCTGCAAG  | 4 | 0.08 | NM_008831    |
| OT_Cdkn2a-ex2_7    | Chr3  | -1 | 53474746  | GTGCGATAGTTGCATGCGGCCGG  | 4 | 0.00 | NM_173382    |
| <i>Cdkn2b</i>      |       |    |           |                          |   |      |              |
| OT_Cdkn2b_1        | Chr11 | 1  | 116110179 | ACCGGCTCCCGGAGCGGTTCCAG  | 4 | 0.73 | NM_172570    |
| OT_Cdkn2b_2        | Chr17 | -1 | 25067936  | GGGGCTCTGAAGGGTTCTGG     | 3 | 0.72 | None         |
| OT_Cdkn2b_3        | Chr5  | -1 | 112046540 | GGCGGCTGCAGAAGCGGTTGAGG  | 4 | 0.61 | None         |
| OT_Cdkn2b_4        | Chr14 | 1  | 21750555  | CCCGCTCCCGAAGCAGTTCGG    | 3 | 0.56 | NM_026283    |
| OT_Cdkn2b_5        | Chr14 | 1  | 25710848  | GGATGCTCCCGAAGCGGTGCTGG  | 4 | 0.50 | None         |
| OT_Cdkn2b_6        | Chr2  | -1 | 148044131 | TGCGCCGCGAAGCGCTTCAAG    | 4 | 0.39 | NM_010446    |
| <i>Pten</i>        |       |    |           |                          |   |      |              |
| OT_Pten_1          | Chr1  | -1 | 96400219  | CCTATCGATTTCTTTGATGATGG  | 3 | 2.53 | None         |
| OT_Pten_2          | Chr10 | 1  | 11786839  | AATACCGGTCTCTTTGATGATGG  | 4 | 1.39 | None         |
| OT_Pten_3          | Chr6  | 1  | 110140664 | TGTCACGATGTCTTTGATGAAGG  | 4 | 1.32 | None         |
| OT_Pten_4          | Chr1  | -1 | 146699106 | GCTTACGATGTATTGATGATGG   | 3 | 1.21 | None         |
| OT_Pten_5          | Chr12 | -1 | 8410402   | AGTAGCTATCTTTGATGAGAG    | 4 | 0.93 | None         |
| OT_Pten_6          | Chr2  | 1  | 37427652  | TGTAACAATGTCTTTGATGAAAG  | 4 | 0.90 | NM_146253    |
| OT_Pten_7          | Chr3  | 1  | 138451237 | GCTGACACTGTCTTTGATGATAG  | 4 | 0.86 | NM_007410    |
| OT_Pten_8          | Chr10 | -1 | 63017546  | GGAAACGATGGCTTTGATGACAG  | 4 | 0.72 | NM_001079824 |
| <i>Rosa26.1</i>    |       |    |           |                          |   |      |              |
| OT_Rosa26.1_1      | Chr16 | 1  | 19408733  | TTGATTATTTGATACCATATAAG  | 2 | 2.47 | None         |
| OT_Rosa26.1_2      | Chr8  | -1 | 55887271  | TTGTTAATGTCTACCATATGGG   | 3 | 1.45 | None         |
| OT_Rosa26.1_3      | Chr4  | -1 | 93809596  | TTGATTAATTTCTACCATATTGG  | 3 | 1.21 | None         |
| OT_Rosa26.1_4      | Chr10 | 1  | 37034194  | ATGTTTCTTTGCTACCATATTAG  | 4 | 0.90 | None         |
| OT_Rosa26.1_5      | Chr6  | -1 | 38705196  | CTTCTTATTGACTACCATATCAG  | 4 | 0.80 | None         |
| OT_Rosa26.1_6      | ChrX  | 1  | 155324145 | TTGATTGTTGTATACCATATCAG  | 3 | 0.46 | NM_016764    |

|                 |       |    |           |                         |   |      |              |
|-----------------|-------|----|-----------|-------------------------|---|------|--------------|
| OT_Rosa26.1_8   | Chr17 | -1 | 85607421  | CTGATTATTACCTGCCATATCGG | 4 | 0.12 | NR_015387    |
| <i>Rosa26.2</i> |       |    |           |                         |   |      |              |
| OT_Rosa26.2_1   | Chr13 | -1 | 54604762  | TGGACCCAGAAGACTATCTGTAG | 3 | 1.59 | None         |
| OT_Rosa26.2_2   | Chr2  | -1 | 42198522  | TAGGACCAAAAGACTATCTGTAG | 3 | 1.52 | None         |
| OT_Rosa26.2_3   | Chr3  | -1 | 95594328  | TAATCCACAAGACTATCTCAAG  | 3 | 1.42 | None         |
| OT_Rosa26.2_4   | Chr10 | -1 | 70183548  | TTGTCCCTCAAGTCTATCTGCAG | 3 | 1.12 | None         |
| OT_Rosa26.2_5   | ChrX  | -1 | 51672728  | TGCTCCCTGAAGACTATCTGTGG | 4 | 0.84 | None         |
| OT_Rosa26.2_6   | Chr3  | 1  | 96637363  | TTATCCTACAAGACTATGTGTAG | 4 | 0.21 | NM_011069    |
| OT_Rosa26.2_7   | Chr11 | -1 | 96447670  | AAGTCCCCATGACTTTCTGCAG  | 4 | 0.15 | NR_033524    |
| OT_Rosa26.2_8   | Chr4  | -1 | 117897880 | CAGTCCCACATAACTATATGAGG | 4 | 0.09 | NM_146152    |
| <i>Smad4</i>    |       |    |           |                         |   |      |              |
| OT_Smad4_1      | Chr18 | 1  | 39700412  | AATAGCAGCTCATAGTGATAGAG | 4 | 0.91 | None         |
| OT_Smad4_2      | Chr6  | -1 | 127223185 | ATAACCCGCTTATAGTGATGTGG | 3 | 0.83 | None         |
| OT_Smad4_3      | Chr8  | -1 | 85849958  | ACAGCCCTTACATAGTGATAGGG | 4 | 0.77 | None         |
| OT_Smad4_4      | Chr13 | 1  | 31135739  | ACAAACATCTCCTAGTGATATGG | 4 | 0.47 | None         |
| OT_Smad4_5      | Chr1  | 1  | 168232264 | GAAACCAGCTCAAAGTGATAGAG | 4 | 0.40 | None         |
| OT_Smad4_6      | Chr10 | 1  | 21148552  | ACTATCTGCTCAAAGTGATACGG | 4 | 0.38 | NM_001198914 |
| <i>Trp53</i>    |       |    |           |                         |   |      |              |
| OT_Trp53_1      | Chr17 | -1 | 54419858  | AACACTTGGAGGGCTTCACTTGG | 2 | 4.57 | None         |
| OT_Trp53_2      | Chr5  | -1 | 106714108 | ATCACTTGGAGGGCTTCACTCAG | 3 | 1.74 | None         |
| OT_Trp53_3      | Chr10 | -1 | 109647934 | GGCTGTGAGAGGGCTTCACTCAG | 4 | 1.36 | None         |
| OT_Trp53_4      | Chr9  | -1 | 49800050  | GTCTGTGAGAGGGCTTCACTGAG | 4 | 1.36 | None         |
| OT_Trp53_5      | Chr5  | -1 | 117024931 | CACACTGGGAAGGCTTCACTTAG | 3 | 1.07 | None         |
| OT_Trp53_6      | Chr2  | -1 | 35730631  | GGCAGTCAGAGGTCTTCACTCAG | 4 | 0.57 | NM_001114125 |
| OT_Trp53_7      | Chr2  | -1 | 62501156  | GACAGTCTGAAGGCTTACATGG  | 4 | 0.37 | NM_007986    |
| OT_Trp53_8      | Chr2  | -1 | 158261400 | AACACTCGGAGGCCATCACTGGG | 3 | 0.33 | NM_177850    |

**Supplementary Table 3 | Genomic regions analysed for off-target effects by CRISPR/Cas9 *in vivo* electroporation.** The respective chromosome, location, genomic sequence (off-target binding site) and the number of mismatches (in regard to the on-target sequence) of each off-target are given. The top five off-target regions for each sgRNA plus the three best-ranked exonic regions have been analysed. The off-target score indicates the strength of the guide-DNA interaction and is computed by taking into account the total number, the pair-wise distribution and the proximity of mismatches to the PAM site<sup>14</sup>. The lower the score the less likely a Cas9-mediated mutation will occur.

| Name          | Forward primer           | Reverse primer           | T <sub>a</sub> [°C] |
|---------------|--------------------------|--------------------------|---------------------|
| <i>Apc</i>    |                          |                          |                     |
| OT_Apc_1      | CTGAGTGTGGTCTATACTCAAG   | ACTAGGATTAGGACCTAGGAAACA | 60                  |
| OT_Apc_2      | AGATCTGCAGTTCACCCCAA     | GGGAGTCCAGGAAGCAGAAT     | 60                  |
| OT_Apc_3      | AGTTACTGGTGGCTGTAAGACA   | AGAGTGGCAGTTCAAGGTAGT    | 60                  |
| OT_Apc_4      | ATCCAACGCTGATTCCCTTGC    | GGGAGGTGATTGAGAGGGAC     | 60                  |
| OT_Apc_5      | CCTGGTTTTACGTTGCTGCT     | CTATTTGCCTGCACCTCCAG     | 60                  |
| OT_Apc_6      | CAATGCAAAGGTGTTCTGACA    | TCACCACCCTTGCTGTAAC      | 60                  |
| OT_Apc_7      | CACCTTGCTTCAGTCTGAGCC    | CCTGCAGTCAACCTTGTTTC     | 60                  |
| OT_Apc_8      | CGAACCTGTCAGTTGCAAGT     | TGCGATGTTCTGGGCTATCT     | 60                  |
| <i>Arid1a</i> |                          |                          |                     |
| OT_Arid1a_1   | TCCAGATGCCAACCCCTATC     | GCCACAGACCCTATTCTCTCA    | 60                  |
| OT_Arid1a_2   | TGAGAGGGTCACGAGTTGG      | CTATTGCCCCAGACCCAGAG     | 60                  |
| OT_Arid1a_3   | TGTCTACGATCACAGTGCAGT    | ACACAGGCTGTAACCTCTGAAGA  | 60                  |
| OT_Arid1a_4   | CAGAGGAAGTTGGGTGAGGA     | TCATGCTCATCAGGGCTTCT     | 60                  |
| OT_Arid1a_5   | GCCAACAGGTGAGTCTTCTAAC   | CAGGCCCATGTTGTCTGAAG     | 60                  |
| OT_Arid1a_6   | CGGCAAGTTCTGTTTGTGCT     | GTCTGGGTCTCATCTCCTGG     | 60                  |
| OT_Arid1a_7   | TCCTCGAAGTAGACATATCCACA  | TGCAAAGTCTTCTGGAGC       | 60                  |
| <i>Arid1b</i> |                          |                          |                     |
| OT_Arid1b_1   | GGCTCTAAAACCCCAACCT      | GTTCCCACTGGGAGCCTGA      | 60                  |
| OT_Arid1b_2   | GTGGTAGGAGCTTGGAGTCG     | AACCAGGGGATCAAGGACTG     | 60                  |
| OT_Arid1b_3   | TGCTACATCTGGAGCCTCTTG    | CACCTTCAGAGAGCAGCAGTA    | 60                  |
| OT_Arid1b_4   | TGAAAAGAGAACGACGGCGA     | ACTCCTCTACCTGTGTCCCG     | 60                  |
| OT_Arid1b_5   | CATCCAGACCCCTTTCAGC      | GAGTGGGCAGGAGAAATCCG     | 60                  |
| OT_Arid1b_6   | GTGGTGTGTCTGATTGCCTT     | GCGCAGCACTCCTGTAAGA      | 60                  |
| <i>Arid5b</i> |                          |                          |                     |
| OT_Arid5b_1   | CACAACCAAGGTCTGACGC      | AAGCTGAAAGTCCCAGTTGGAT   | 60                  |
| OT_Arid5b_2   | ACCAGTTGGTTTGTGCAGGG     | TGGTAGCTGGAACCTTTCCC     | 60                  |
| OT_Arid5b_3   | GAAAAGCCCAACAAGCTGGA     | TGTGCCATTTGCCCAGGTTT     | 60                  |
| OT_Arid5b_4   | GCCAGCTAACTTATACTCTGGTTG | CTGCACCATGCCTGCCTAT      | 63                  |
| OT_Arid5b_5   | GATTTCTGTGGACCAGCACC     | TCTGTGCACTTTGGCGCTTA     | 63                  |
| OT_Arid5b_6   | ATTGCTTTGCTCTCCCCAGG     | GTACCTCAGGCATCCACAT      | 60                  |
| OT_Arid5b_7   | TGGTTGACCTATGCACGACC     | GCACATTGCAAAGGTCTCA      | 60                  |
| <i>Atm</i>    |                          |                          |                     |
| OT_Atm_1      | TGAGGGTTCAAACCCACCCC     | AGAAGATCAGTGGTCAGCCC     | 63                  |
| OT_Atm_2      | ACTAGCCCCCTTTTGTCTCTT    | GGAGCTCAGGAACTAGGGGT     | 60                  |
| OT_Atm_3      | CTGGAGCAGCGGCTTTAAGT     | CTGCTGTCCCCACATGGAAG     | 60                  |
| OT_Atm_4      | ACCTCGAGAATTGCAGGTCC     | GGGAATTGAGAAAGTGTGGAGT   | 60                  |
| OT_Atm_5      | GGCCAGTCATCTATGCAGTCA    | TCTTTATCCAGCCGACGCT      | 60                  |
| OT_Atm_6      | TGTGATACACGGGACTGTGAG    | CATGCCATGCCATTTGTGC      | 60                  |
| OT_Atm_7      | CCTGTGAGTGTGAGGTTCA      | CAGCGAAAGCTGAAACCGTA     | 60                  |
| OT_Atm_8      | TCGGGTGCTCTTAATCTGCTG    | TGTTCTTGGAGTCTTGTGTA     | 63                  |
| <i>Brca1</i>  |                          |                          |                     |
| OT_Brca1_1    | GACTTCGTGGACAGAATGGC     | TCCAGCCCTGTTTGATTCTT     | 60                  |
| OT_Brca1_2    | GAGAACTGCAGAGCCCATTG     | ACCGACATTTTCCCTCCTT      | 60                  |
| OT_Brca1_3    | TCCAAAGGCTGCTAGTGGA      | CCTCGACCCCTCCCAATTTT     | 60                  |
| OT_Brca1_4    | CCCAACACAGCCCACTACA      | ACCTGCAGAGTAAAGGGCTC     | 60                  |
| OT_Brca1_5    | TGGATTCCAGCCTCTGTCAA     | TGTCCCTAGCCAGTACCTCT     | 60                  |
| OT_Brca1_6    | TAGCAGGGACCTCAAAGTGG     | ATAGCAGCCCATGAAGCCAG     | 63                  |

|                    |                         |                          |    |
|--------------------|-------------------------|--------------------------|----|
| OT_Brca1_7         | GCACTGTAAGCTCAACCCAG    | CCTCTGCCACATGAGTACCA     | 60 |
| OT_Brca1_8         | ACATGACTGGAGTTAGAAAAGGA | TGTGCTTGCTATTCTATGATGA   | 60 |
| <i>Brca2</i>       |                         |                          |    |
| OT_Brca2_1         | CACAGTAGGTTGGGTCTTCC    | GACAGGGTTGGAGAGTGCC      | 60 |
| OT_Brca2_2         | GCGCTGTTATTTCCTCCGTT    | AGCAAGGCCAGTGATCTCAT     | 60 |
| OT_Brca2_3         | TGAGCAAGTCACTTTGAAAACA  | AAGTGGGAACCTCAGGAGGG     | 60 |
| OT_Brca2_4         | CACTGAGTGCATGCTTGGC     | ACTAGTGAGCCCTGCCTTTC     | 60 |
| OT_Brca2_5         | GACACAGGAAGAGGGAGACA    | ATCAAGCCACCAGAATCCCT     | 60 |
| OT_Brca2_6         | TGCATTTCCCTTTGACACCAGT  | ATCAGAGATCTCCGTGGCTG     | 60 |
| OT_Brca2_7         | AGAAGGAATTTGGGATTTTGCA  | TGGAGAGTGAGCTAGCCAAG     | 60 |
| <i>Cdkn2a-ex1β</i> |                         |                          |    |
| OT_Cdkn2a-ex1β_1   | GCTTCCTGAAACCTGCATC     | CATCAAGGACTAGGAGCAATGA   | 60 |
| OT_Cdkn2a-ex1β_2   | GTTGCCCTCATCTCAGACCT    | TTCCAAGTGCAGCAAAGGTC     | 63 |
| OT_Cdkn2a-ex1β_4   | GGGGAGAGGGTCTAGAAGGA    | TCCACAGATCATTGGCGAGA     | 60 |
| OT_Cdkn2a-ex1β_5   | GGCATCTTTTCATTTGTCAGCC  | ACACAGACACACAGATCCAAT    | 60 |
| OT_Cdkn2a-ex1β_6   | ACTTCAGTGATCGCTAGGCC    | CACACAGTGGGGCATAGAGA     | 60 |
| OT_Cdkn2a-ex1β_7   | TGAGGACATGCACACAGACT    | AATGCTTGGCTGGGTGATTG     | 60 |
| OT_Cdkn2a-ex1β_8   | CTGCAGAGAGTTCCAGGAA     | CTCTTCATTGCTGATCCGCC     | 60 |
| <i>Cdkn2a-ex2</i>  |                         |                          |    |
| OT_Cdkn2a-ex2_1    | TGGGCTTGTTTTAAAGGGGC    | CAATGTCTGCTGCTCACCTG     | 63 |
| OT_Cdkn2a-ex2_2    | GTCTGTTTGGATGCCCTTGG    | AGGCTACTCTTGCTGTCTCC     | 63 |
| OT_Cdkn2a-ex2_3    | AAACTGAACTTGCTCGGCTC    | TTGAGCATGAGAGGGGAAGCA    | 60 |
| OT_Cdkn2a-ex2_4    | TACCACTTCCTTCCCTGCAG    | ATTGACTGCCTACCCTGGG      | 60 |
| OT_Cdkn2a-ex2_5    | TTACCTAACTCCTGGGCGAG    | CAGGAAGCTAGACTGTGCCT     | 60 |
| OT_Cdkn2a-ex2_6    | CCATCCTGTCAGTGGTTCCCT   | GCTACCTACCCACCACTACTC    | 60 |
| OT_Cdkn2a-ex2_7    | ACTGGGGCATCTTCAGTCTC    | AGTGAAAAGCCCCAATGATAAGT  | 60 |
| <i>Cdkn2b</i>      |                         |                          |    |
| OT_Cdkn2b_1        | GACAGCGTGTGTTCTTGC      | GAAGTCTCAAGAGGGTCTGTC    | 63 |
| OT_Cdkn2b_2        | TTTTGGGCAAACAGACCCG     | TCAACCTGATTGCTGCCTTTC    | 60 |
| OT_Cdkn2b_3        | TCATCCACCTCTCCCTTCTCT   | TGTGTAGATGCTCTGGGGAC     | 63 |
| OT_Cdkn2b_4        | AGGACTGACTGAGAAGGGGTT   | CTAAGTCGCCGTTGGAGTCG     | 60 |
| OT_Cdkn2b_5        | GATACGGGTCTTGCTTCTGGA   | GCCCCCTGAGCATCACTTGG     | 60 |
| OT_Cdkn2b_6        | GAGGCAGGTGCTCCCTTAG     | CCTCTTCCCTTCTACCGGC      | 60 |
| <i>Pten</i>        |                         |                          |    |
| OT_Pten_1          | CAAGAGAAAGACAAGGCATGGT  | AGAAGGGAGGAGGGAAGGAA     | 60 |
| OT_Pten_2          | GGAGCAGCTTGGAGTCTGAT    | CATTGCCAGCACAGTTCTCA     | 63 |
| OT_Pten_3          | GGAACATTAAGAGTGAAACAGCT | AAATAGGTGGCAGAACGGGT     | 63 |
| OT_Pten_4          | CATGCAACAACAGAGGACACA   | TCCTTCTTCTGACCAAATGTGA   | 63 |
| OT_Pten_5          | AACAATGCTCAGAGGGTCCC    | GATGGAATGTTGGGCCTCAA     | 60 |
| OT_Pten_6          | AAGGGTGGACTACAAAAGAGC   | ACAGAAAGGTTTGTCTTGGCC    | 60 |
| OT_Pten_7          | GCTGTGGTATTTCAACTGGCT   | TGACCTTCACGTTGCCAATG     | 63 |
| OT_Pten_8          | CCATAGCCATGTCCTCCCAT    | GCTGCAAACATTAATGAAGAAGC  | 60 |
| <i>Rosa26.1</i>    |                         |                          |    |
| OT_Rosa26.1_1      | CCCATGTGTAGTGTAATCATCC  | TCACACAGGTAAGTAATGTGTTGT | 60 |
| OT_Rosa26.1_2      | CTGGGGCATCACCAAATTGT    | CGGCTGAACCTAATTGCTCCTTT  | 60 |
| OT_Rosa26.1_3      | AAAGCCTGGAGTTTCTGTTGCT  | TTTACTAGCTCAGAGATTGGGACT | 60 |
| OT_Rosa26.1_4      | AACCAGGGACTGAAAAGCA     | AGGGCTTTTGTGCATGCTAAG    | 60 |
| OT_Rosa26.1_5      | CATTCTGAGGTGGCCAGG      | AAAGGCTTCGAACCAAAAATGT   | 60 |
| OT_Rosa26.1_6      | TTACAATGGCAAACGAATATGGT | AGCAGACTCGGTGCTCTTAAC    | 60 |
| OT_Rosa26.1_8      | CCTCAATCCCCTACTACGTTT   | AGGGGTGATTTGCAACTCGT     | 60 |

|                 |                           |                          |    |
|-----------------|---------------------------|--------------------------|----|
| <i>Rosa26.2</i> |                           |                          |    |
| OT_Rosa26.2_1   | CTGTCCCCCAGTAGCCAAAG      | CTCTGCTATCACAGTGCCCC     | 60 |
| OT_Rosa26.2_2   | TCATAACTGAGATTGTTAAAGACCA | CAGGGTTGGGACACTAGTTGA    | 60 |
| OT_Rosa26.2_3   | GAAATGACATTCCCAGCCC       | TTGGTCCTCAGAACCCTCAG     | 60 |
| OT_Rosa26.2_4   | TGCTTGCCCTCATCTGACCC      | TCACGGTAGTGCTGGCTAGA     | 60 |
| OT_Rosa26.2_5   | AGACTTCCATGGGATGTGAGAAAT  | AATTCATTCTGAAGGGTGTATCTC | 60 |
| OT_Rosa26.2_6   | CTGGGGAACCAACAGATGC       | TTGATTCCCAGAGCCCACAT     | 60 |
| OT_Rosa26.2_7   | TATTCTGGGGTGCGTTCAGC      | CATGCCAGGCGTTTGTAGC      | 60 |
| OT_Rosa26.2_8   | AGGCAAAGGGGCACTAAAGG      | GTCCTTCACTCTGCCGTCTC     | 63 |
| <i>Smad4</i>    |                           |                          |    |
| OT_Smad4_1      | CATCATCTCCAAGGCCCTCA      | GCCATTCCAGGGATCAAACC     | 60 |
| OT_Smad4_2      | CAGATATGGTGGTGCATGCC      | TTGGAAAGCAGAGCAACAGG     | 60 |
| OT_Smad4_3      | GGGGTTCCTGGGAGTCTTTT      | TACTGTGGCCTTGAGAAGCA     | 60 |
| OT_Smad4_4      | TAAGCAGCACTCACCAACAA      | GCTCAGTCACCTAAGCTTGT     | 60 |
| OT_Smad4_5      | AAAGTGGGACTCATAGGGCC      | TCCCGTCTCAGGTCACAAAA     | 60 |
| OT_Smad4_6      | TAATGCCTGCTGTCCCTTCA      | TGAGATCATCTGACGGGCAA     | 60 |
| <i>Trp53</i>    |                           |                          |    |
| OT_Trp53_1      | CCTAGCATTTCAGGCCCTCAT     | TGAGGGGAGGAGAGTACAGT     | 60 |
| OT_Trp53_2      | GGATTGTCCCTGTACCACTTC     | AACAAATGTGCGGGCAACTT     | 60 |
| OT_Trp53_3      | GCATGCACTGAACAGAAATTGG    | TCAGAGGAGATTTGCTTGGGA    | 60 |
| OT_Trp53_4      | CCCTGGCTCTTCTGTGTGTA      | GAACCCGCAGCATGTGATAG     | 60 |
| OT_Trp53_5      | CATGATGCCTGTTACGAGG       | CTGGTAAAAGGTGCTGGCTT     | 60 |
| OT_Trp53_6      | CATGCTGTTTGGGTGGAAGG      | AGAAAAGAGGGGCTGGTTCC     | 60 |
| OT_Trp53_7      | CTACCCGGCAATGAACAGGT      | CCAAGTGGCCAAGAAGCAAA     | 60 |
| OT_Trp53_8      | GGCTTGCCGTCTTTGTTGAT      | AAGTGGACAGTTCTCCAGC      | 60 |

**Supplementary Table 4 | PCR primer used for the off-target analysis.** Primers used for amplifying CRISPR/Cas9 off-target sites and annealing temperature are given. The length of PCR products ranges from 400bp to 450bp.



| Gene                                | Ensembl ID                      | CCDS               | sgRNA sequence              | Exon       |
|-------------------------------------|---------------------------------|--------------------|-----------------------------|------------|
| <i>Apc</i>                          | Apc-001 (ENSMUST00000079362)    | CCDS29125          | TCAGTTGTTAAAGCAAGTTG (AGG)  | 2          |
| <i>Arid1a</i>                       | Arid1a-201 (ENSMUST00000105897) | CCDS38908          | TTAGTCCCACCATACGGCTG (AGG)  | 2          |
| <i>Arid1b</i>                       | Arid1b-201 (ENSMUST00000115797) | CCDS49929          | CTGTGCACCTGGGGACCGT (AGG)   | 2          |
| <i>Arid5b</i>                       | Arid5b-201 (ENSMUST00000020106) | CCDS35929          | GCTATGCCAAATCGGATCCTT (TGG) | 2          |
| <i>Atm</i>                          | Atm-001 (ENSMUST00000118282)    | CCDS40636          | GGCTGTCAACTCCGAAAAC (GGG)   | 7          |
| <i>Brca1</i>                        | Brca1-001 (ENSMUST00000017290)  | CCDS25474          | AAATCTTAGAGTGTCCGATC (TGG)  | 2          |
| <i>Brca2</i>                        | Brca2-201 (ENSMUST00000044620)  | CCDS39411          | TAGGACCGATAAGCCTCAAT (TGG)  | 3          |
| <i>Cdkn2a-ex1<math>\beta</math></i> | Cdkn2a-201 (ENSMUST00000107131) | CCDS18350          | TGGTGAAGTTCGTGCGATCC (CGG)  | 1          |
| <i>Cdkn2a-ex2</i>                   | Cdkn2a-001 (ENSMUST00000060501) | CCDS38812          | GTGCGATATTTGCGTTCCGC (TGG)  | 2          |
|                                     | Cdkn2a-201 (ENSMUST00000107131) | CCDS18350          |                             |            |
| <i>Cdkn2b</i>                       | Cdkn2b-201 (ENSMUST00000097981) | CCDS18351          | GGCGCCTCCCGAAGCGGTTC (AGG)  | 1          |
| <i>Pten</i>                         | Pten-001 (ENSMUST00000013807)   | CCDS29753          | GCTAACGATCTCTTTGATGA (TGG)  | 1          |
| <i>Rosa26.1</i>                     | Gt(ROSA)26Sor                   | OTTMUSG00000034748 | ATATGGTAGCCAATAATCAA (TGG)  | intergenic |
| <i>Rosa26.2</i>                     | Gt(ROSA)26Sor                   | OTTMUSG00000034748 | TAGTCCCACAAGACTATCTG (AGG)  | intergenic |
| <i>Smad4</i>                        | Smad4-001 (ENSMUST00000025393)  | CCDS29337          | GACAACCCGCTCATAGTGATA (TGG) | 2          |
| <i>Trp53</i>                        | Trp53-202 (ENSMUST00000171247)  | CCDS48826          | GACACTCGGAGGGCTTCACT (TGG)  | 3          |

**Supplementary Table 5 | sgRNA target regions by in vivo electroporation of the murine pancreas.** For all respective genes, Ensembl IDs and consensus coding sequences (CCDS) are shown. The used sgRNA sequence including PAM sequence and the targeted exon are displayed.

| Gene                                | Forward Primer                                                             | Reverse Primer        |
|-------------------------------------|----------------------------------------------------------------------------|-----------------------|
| <i>Apc</i>                          | GCGAATAAGCACCACCTCCTC                                                      | AAGAATGAACCAACACCAAGG |
| <i>Arid1a</i>                       | GTTCTGATTCTGTGCTCGC                                                        | TCCATCACCTACCTGCTGTG  |
| <i>Arid1b</i>                       | AGTTCCTGGGGTACTTGGAAATCA                                                   | GGTACTGCAAGCCTCCCA    |
| <i>Arid5b</i>                       | TGGCTTGACGGACCTTATA                                                        | ATCAGCAGTTGGACGGTCTT  |
| <i>Atm</i>                          | TCCTTTTCAACTGTTCTGTTACA                                                    | GACAATGGAAAGGCGAGTCA  |
| <i>Brca1</i>                        | AGCGTGAGAACTCCTCCAAA                                                       | CTGCCATGAGGAAGAACACA  |
| <i>Brca2</i>                        | TCACGAGTTTCTCCGTGTCA                                                       | GCTCTGGCTGTCTCGAACTT  |
| <i>Cdkn2a-ex1<math>\beta</math></i> | TCTCACCTCGCTTGTCACAG                                                       | AAGTACTCCATCTCCCGGGA  |
| <i>Cdkn2a-ex2</i>                   | TCAACTACGGTGCAGATTCG                                                       | CGGGTGGGTAATAATGGGAAC |
| <i>Cdkn2b</i>                       | CCGAAGCTACTGGGTCTCC                                                        | CACTTGCCCAGCTTGACG    |
| <i>Pten</i>                         | TGCGAGGATTATCCGTCTTC                                                       | CATCCGTCTACTCCCACGTT  |
| <i>Rosa26.1</i>                     | TCTGATGCCCTTCTGGTG                                                         | GGCTAAACTCTGGCCCTACA  |
| <i>Rosa26.2</i>                     | GGAAGGATTGTCTGTGCCCT                                                       | ATTTTCAAAGCCCTCCCA    |
| <i>Smad4</i>                        | TGCAGTGTACAGATGCTCA                                                        | CTCAGGAAGTGGAGGAAGCA  |
| <i>Trp53</i>                        | ACATAGCAAGTTGGAGGCCA                                                       | CCACTCACCGTGACATAAC   |
| <b>Library barcoding primers</b>    |                                                                            |                       |
| PE adapter top strand               | ACACTCTTCCCTACACGACGCTCTTCCGATCT                                           |                       |
| PE adapter bottom strand            | GATCGGAAGAGCGGTTCAGCAGGAATGCCGAG                                           |                       |
| PE 1.0                              | AATGATACGGCGACCACCGAGATCTACACTCTTCCCTACACGACGCTCT<br>TCCGATCT              |                       |
| iPCRtag                             | CAAGCAGAAGACGGCATAACGAGATXXXXXXXXXCGGTCTCGGCATTCTG<br>CTGAACCGCTCTTCCGATCT |                       |

**Supplementary Table 6 | Primer sets for amplification of genomic target regions for Sanger and Next Generation sequencing.** Indicated primer sets produce amplicons between 400 and 600bp in length. Oligos used for Illumina next generation sequencing are stated beneath.

| Antibody          | Vendor                     | Host   | Pre-treatment                                     | Dilution |
|-------------------|----------------------------|--------|---------------------------------------------------|----------|
| E-cadherin        | Cell signaling             | rabbit | 10 mM sodium citrate buffer pH 6.0; 95°C; 10 min  | 1:400    |
| Cytokeratin 19    | Hybridoma bank (TROMAIIIc) | rat    | EDTA; 100°C; 20 min                               | 1:500    |
| Cleaved Caspase 3 | Cell signaling             | rabbit | 10 mM sodium citrate buffer pH 6.0; 100°C; 20 min | 1:200    |
| GFP               | Fitzgerald                 | rabbit | EDTA; 100°C; 20 min                               | 1:200    |

**Supplementary Table 7 | List of primary antibodies used for IHC.**

| Primer        | Sequence              |
|---------------|-----------------------|
| EGFP-tdEG-LP  | CCATGTGATCGCGCTTCTCGT |
| caggs-sc-UP4  | GTTCGGCTTCTGGCGTGT    |
| tdEG-nest-INf | GCAACGTGCTGGTTATTGTG  |
| tdEG-nest-INr | CTCGATGTTGTGGCGGATCT  |

**Supplementary Table 8 | Nested PCR primers used for detection of recombined  $R26^{mT-mG}$  allele after somatic PGK-Cre delivery by *in vivo* electroporation of the murine pancreas.**

## Supplementary References

1. Jiao Y, *et al.* Whole-exome sequencing of pancreatic neoplasms with acinar differentiation. *The Journal of pathology* **232**, 428-435 (2014).
2. Furlan D, *et al.* APC alterations are frequently involved in the pathogenesis of acinar cell carcinoma of the pancreas, mainly through gene loss and promoter hypermethylation. *Virchows Archiv : an international journal of pathology* **464**, 553-564 (2014).
3. Biankin AV, *et al.* Pancreatic cancer genomes reveal aberrations in axon guidance pathway genes. *Nature* **491**, 399-405 (2012).
4. Jones S, *et al.* Core signaling pathways in human pancreatic cancers revealed by global genomic analyses. *Science* **321**, 1801-1806 (2008).
5. Shain AH, *et al.* Convergent structural alterations define SWItch/Sucrose NonFermentable (SWI/SNF) chromatin remodeler as a central tumor suppressive complex in pancreatic cancer. *Proceedings of the National Academy of Sciences of the United States of America* **109**, E252-259 (2012).
6. Lynch HT, Deters CA, Lynch JF, Brand RE. Familial pancreatic carcinoma in Jews. *Familial cancer* **3**, 233-240 (2004).
7. Goggins M, *et al.* Germline BRCA2 gene mutations in patients with apparently sporadic pancreatic carcinomas. *Cancer research* **56**, 5360-5364 (1996).
8. Ozcelik H, *et al.* Germline BRCA2 6174delT mutations in Ashkenazi Jewish pancreatic cancer patients. *Nature genetics* **16**, 17-18 (1997).
9. Caldas C, *et al.* Frequent somatic mutations and homozygous deletions of the p16 (MTS1) gene in pancreatic adenocarcinoma. *Nature genetics* **8**, 27-32 (1994).
10. Schutte M, *et al.* Abrogation of the Rb/p16 tumor-suppressive pathway in virtually all pancreatic carcinomas. *Cancer research* **57**, 3126-3130 (1997).
11. Redston MS, *et al.* p53 mutations in pancreatic carcinoma and evidence of common involvement of homocopolymer tracts in DNA microdeletions. *Cancer research* **54**, 3025-3033 (1994).
12. Asano T, Yao Y, Zhu J, Li D, Abbruzzese JL, Reddy SA. The PI 3-kinase/Akt signaling pathway is activated due to aberrant Pten expression and targets transcription factors NF-kappaB and c-Myc in pancreatic cancer cells. *Oncogene* **23**, 8571-8580 (2004).
13. Hahn SA, *et al.* DPC4, a candidate tumor suppressor gene at human chromosome 18q21.1. *Science* **271**, 350-353 (1996).
14. Hsu PD, *et al.* DNA targeting specificity of RNA-guided Cas9 nucleases. *Nature biotechnology* **31**, 827-832 (2013).
